# Supplementary material for: Rationalising the effects of ionic liquids on a nucleophilic aromatic substitution reaction
Source: Royal Society of Chemistry journal article supplement (doi:10.1039/c7ob01476g), 2017-01-01
Supplement: c7ob01476g1.pdf [file c7ob01476g1.pdf]

## Electronic supporting information for

“Rationalising the effects of ionic liquids on a  
nucleophilic aromatic substitution reaction”

Rebecca R. Hawker, Michaela J. Wong, Ronald S. Haines and Jason B. Harper\*  
*School of Chemistry, University of New South Wales, Sydney, NSW, 2052, Australia.*

|                                                                                                                                                                     |    |
|---------------------------------------------------------------------------------------------------------------------------------------------------------------------|----|
| Synthesis of the ionic liquids 3-7                                                                                                                                  | 2  |
| <sup>1</sup> H NMR spectra of the ionic liquids 3-7                                                                                                                 | 5  |
| Kinetic analyses                                                                                                                                                    | 8  |
| Rate data for the mole fraction dependence plots shown in Figures 1 and 2                                                                                           | 9  |
| Eyring plot for the data shown in Table 2 in the main text                                                                                                          | 15 |
| Rate data for the Eyring plot shown in Figure S1                                                                                                                    | 16 |
| The change in the activation parameters from $\chi_{\text{IL}} 0 \rightarrow 0.5$ , $\chi_{\text{IL}} 0.5 \rightarrow 0.8$ and $\chi_{\text{IL}} 0 \rightarrow 0.8$ | 20 |
| References                                                                                                                                                          | 24 |

### Synthesis of the ionic liquids 3-7

#### ***N*-Butyl-*N*-methylpyrrolidinium *bis*(trifluoromethanesulfonyl)imide 3**

*n*-Bromobutane (50.0 mL, 0.464 mol) was added to *N*-methylpyrrolidine (30.0 mL, 0.288 mol) and stirred at room temperature under a nitrogen atmosphere for 2 days. During this time a white solid formed. This solid was then triturated with ethyl acetate (5 x 200 mL) and any resulting solvent was removed under reduced pressure to yield the bromide salt as a cream solid (59.0 g, 0.265 mol, 92%). m.p. 217-220 °C (lit.<sup>1</sup> 216-217 °C). <sup>1</sup>H NMR (400 MHz, CD<sub>3</sub>CN):  $\delta$  0.97 (t,  $J$  = 7.4 Hz, 3H, CH<sub>2</sub>CH<sub>3</sub>), 1.38 (m, 2H, CH<sub>3</sub>CH<sub>2</sub>), 1.72 (m, 2H, NCH<sub>2</sub>CH<sub>2</sub>CH<sub>2</sub>CH<sub>3</sub>), 2.15 (m, 4H, NCH<sub>2</sub>CH<sub>2</sub>CH<sub>2</sub>CH<sub>2</sub>N), 2.97 (s, 3H, N(CH<sub>3</sub>), 3.27 (m, 2H, NCH<sub>2</sub>CH<sub>2</sub>CH<sub>2</sub>CH<sub>3</sub>), 3.44 (m, 4H, NCH<sub>2</sub>CH<sub>2</sub>CH<sub>2</sub>CH<sub>2</sub>N).

A solution of lithium *bis*(trifluoromethanesulfonyl)imide (26.9 g, 0.0938 mol) in water (100 mL) was added to a solution of *N*-butyl-*N*-methylpyrrolidinium bromide (18.5 g, 0.0834 mol) in water (100 mL). Immediately two layers formed, and this mixture was stirred at room temperature for 20 hours. The aqueous layer was extracted with dichloromethane (3 x 100 mL) and then the combined organic layers were washed with water (15 x 150 mL). The residual solvent was removed under reduced pressure to yield the salt **3** as a light yellow viscous oil (29.1 g, 0.0690 mol, 83%). <sup>1</sup>H NMR (300 MHz, CD<sub>3</sub>CN):  $\delta$  0.96 (t,  $J$  = 7.4 Hz, 3H, CH<sub>2</sub>CH<sub>3</sub>), 1.36 (m, 2H, CH<sub>3</sub>CH<sub>2</sub>), 1.71 (m, 2H, NCH<sub>2</sub>CH<sub>2</sub>CH<sub>2</sub>CH<sub>3</sub>), 2.15 (m, 4H, NCH<sub>2</sub>CH<sub>2</sub>CH<sub>2</sub>CH<sub>2</sub>N), 2.93 (s, 3H, N(CH<sub>3</sub>), 3.21 (m, 2H, NCH<sub>2</sub>CH<sub>2</sub>CH<sub>2</sub>CH<sub>3</sub>), 3.39 (m, 4H, NCH<sub>2</sub>CH<sub>2</sub>CH<sub>2</sub>CH<sub>2</sub>N).

#### **1-Butyl-3-methylimidazolium *bis*(trifluoromethanesulfonyl)imide 4**

*N*-Methylimidazole (50.0 mL, 0.627 mol) was added to *n*-bromobutane (82.0 mL, 0.753 mol) and was stirred at room temperature under a nitrogen atmosphere for 7 days. During this time a white precipitate formed. The resulting solid was triturated with ethyl acetate (5 x 200 mL) and any resulting solvent was removed under reduced pressure to yield the bromide salt as a white solid (125 g, 0.571 mol, 91%). m.p. 66-71 °C (lit.<sup>2</sup> 70 °C). <sup>1</sup>H NMR (300 MHz, CD<sub>3</sub>CN):  $\delta$  0.94 (t,  $J$  = 7.4 Hz, 3H, CH<sub>2</sub>CH<sub>3</sub>), 1.31 (m, 2H, CH<sub>3</sub>CH<sub>2</sub>), 1.81 (m, 2H, NCH<sub>2</sub>CH<sub>2</sub>CH<sub>2</sub>CH<sub>3</sub>), 3.85 (s, 3H, N(CH<sub>3</sub>), 4.16 (t,  $J$  = 7.2 Hz, 2H, NCH<sub>2</sub>CH<sub>2</sub>CH<sub>3</sub>), 7.40 (m, 2H, NCHCHN), 8.88 (s, 1H, NCHN).

A solution of lithium *bis*(trifluoromethanesulfonyl)imide (57.8 g, 0.201 mol) in water (50 mL) was added to a solution of the 1-butyl-3-methylimidazolium bromide (34.1 g, 0.155 mol) in water (100 mL), immediately forming two layers that were stirred for 17 hours at room temperature. Dichloromethane (100 mL) was added and the mixture was washed with water (10 x 100 mL). The dichloromethane was removed *in vacuo* to give the salt **4** as a colourless viscous liquid (56.4 g, 0.134 mol, 87%). <sup>1</sup>H NMR (400 MHz, CD<sub>3</sub>CN):  $\delta$  0.94 (t,  $J$  = 7.4 Hz, 3H, CH<sub>2</sub>CH<sub>3</sub>), 1.32 (m, 2H, CH<sub>3</sub>CH<sub>2</sub>), 1.80 (m, 2H, NCH<sub>2</sub>CH<sub>2</sub>CH<sub>2</sub>CH<sub>3</sub>), 3.81 (s, 3H, N(CH<sub>3</sub>), 4.11 (t,  $J$  = 7.3 Hz, 2H, NCH<sub>2</sub>CH<sub>2</sub>CH<sub>3</sub>), 7.34 (m, 2H, NCHCHN), 8.39 (s, 1H, NCHN).

### 1-Butyl-2,3-dimethylimidazolium *bis*(trifluoromethanesulfonyl)imide **5**

*n*-Chlorobutane (65 mL, 0.622 mol) and acetonitrile (57 mL) were added to 1,2-dimethylimidazole (37.4 g, 0.389 mol) and the resulting mixture was heated at 60°C with stirring under a nitrogen atmosphere for 25 days. The resulting yellow reaction mixture was concentrated *in vacuo* and the solvent was removed from the cream solid under reduced pressure. The solid was recrystallised (1:1 acetonitrile/toluene) giving colourless crystals. The crystals were triturated with ethyl acetate (5 x 100 mL) and any remaining solvent removed under reduced pressure, giving 1-butyl-2,3-dimethylimidazolium chloride as white crystalline solid (40.3 g, 0.214 mol, 55%). m.p. 75-80°C (lit.<sup>3</sup> 79 °C). <sup>1</sup>H NMR (300 MHz, CD<sub>3</sub>CN):  $\delta$  0.94 (t,  $J$  = 7.3 Hz, 3H, CH<sub>2</sub>CH<sub>3</sub>), 1.34 (m, 2H, CH<sub>3</sub>CH<sub>2</sub>), 1.74 (m, 2H, NCH<sub>2</sub>CH<sub>2</sub>CH<sub>2</sub>CH<sub>3</sub>), 2.49 (s, 3H, NC(CH<sub>3</sub>)NCH<sub>3</sub>), 3.69 (s, 3H, N(CH<sub>3</sub>)), 4.03 (t,  $J$  = 7.4 Hz, 2H, NCH<sub>2</sub>CH<sub>2</sub>CH<sub>2</sub>CH<sub>3</sub>), 7.26 (m, 2H, NCHCHN).

A solution of the 1-butyl-2,3-dimethylimidazolium chloride (40.3 g, 0.214 mol) in water (150 mL) was added to lithium *bis*(trifluoromethylsulfonyl)imide (74.3 g, 0.259 mol) in water (150 mL), immediately forming two layers that were stirred for 18 hours at room temperature. Dichloromethane (50 mL) was added and the mixture repeatedly washed with water (11 x 100 mL). The dichloromethane was removed *in vacuo* to give a colourless liquid that was dried under reduced pressure for 36 hours to yield the salt **5** as a colourless, viscous liquid (82.1 g, 0.189 mol, 89%). <sup>1</sup>H NMR (300 MHz, CD<sub>3</sub>CN):  $\delta$  0.94 (t,  $J$  = 7.3 Hz, 3H, CH<sub>2</sub>CH<sub>3</sub>), 1.33 (m, 2H, CH<sub>3</sub>CH<sub>2</sub>), 1.73 (m, 2H, NCH<sub>2</sub>CH<sub>2</sub>CH<sub>2</sub>CH<sub>3</sub>), 2.49 (s, 3H, NC(CH<sub>3</sub>)NCH<sub>3</sub>), 3.68 (s, 3H, NCH<sub>3</sub>), 4.02 (t,  $J$  = 7.4 Hz, 2H, NCH<sub>2</sub>CH<sub>2</sub>CH<sub>2</sub>CH<sub>3</sub>), 7.24 (m, 2H, NCHCHN).

### 1-Butyl-2,3,4,5-tetramethylimidazolium *bis*(trifluoromethanesulfonyl)imide **6**

*n*-Bromobutane (43 mL, 0.403 mol) was added to tetramethylimidazole (12.5 g, 0.101 mol) and the resulting mixture was stirred at room temperature under a nitrogen atmosphere for 6 days. During this time a white precipitate formed. The mixture was then triturated with ethyl acetate (5 x 150 mL) and then the residual solvent was removed under reduced pressure to yield the bromide salt as a white solid (21.4 g, 0.0821 mol, 82%). m.p. 86-91°C (lit.<sup>4</sup> 95 °C). <sup>1</sup>H NMR (300 MHz, CD<sub>3</sub>CN):  $\delta$  0.94 (t,  $J$  = 7.3 Hz, 3H, CH<sub>2</sub>CH<sub>3</sub>), 1.38 (m, 2H, CH<sub>3</sub>CH<sub>2</sub>), 1.63 (m, 2H, NCH<sub>2</sub>CH<sub>2</sub>CH<sub>2</sub>CH<sub>3</sub>), 2.18 (s, 3H, NC(CH<sub>3</sub>)C(CH<sub>3</sub>)N), 2.20 (s, 3H, NC(CH<sub>3</sub>)C(CH<sub>3</sub>)N), 2.51 (s, 3H, NC(CH<sub>3</sub>)NCH<sub>3</sub>), 3.55 (s, 3H, N(CH<sub>3</sub>)), 3.97 (m, 2H, NCH<sub>2</sub>CH<sub>2</sub>CH<sub>2</sub>CH<sub>3</sub>).

A solution of lithium *bis*(trifluoromethanesulfonyl)imide (38.5 g, 0.134 mol) in water (100 mL) was added to a solution of the 1-butyl-2,3,4,5-tetramethylimidazolium bromide (28.8 g, 0.110 mol) in water (50 mL), immediately forming two layers that were stirred for 17 hours at room temperature. Dichloromethane (100 mL) was added and the mixture was washed with water (10 x 100 mL). The dichloromethane was removed *in vacuo* to give the salt **6** as a white solid (47.9 g, 0.104 mol, 94%). m.p. 29-32 °C (lit.<sup>5</sup> 31-32 °C). <sup>1</sup>H NMR (300 MHz, CD<sub>3</sub>CN):  $\delta$  0.95 (t,  $J$  = 7.3 Hz, 3H, CH<sub>2</sub>CH<sub>3</sub>), 1.35 (m, 2H, CH<sub>3</sub>CH<sub>2</sub>), 1.63 (m, 2H, NCH<sub>2</sub>CH<sub>2</sub>CH<sub>2</sub>CH<sub>3</sub>), 2.17 (s, 3H,

NC(CH<sub>3</sub>)C(CH<sub>3</sub>)N), 2.20 (s, 3H, NC(CH<sub>3</sub>)C(CH<sub>3</sub>)N), 2.49 (s, 3H, NC(CH<sub>3</sub>)NCH<sub>3</sub>), 3.53 (s, 3H, N(CH<sub>3</sub>), 3.95 (m, 2H, NCH<sub>2</sub>CH<sub>2</sub>CH<sub>2</sub>CH<sub>3</sub>).

#### **Tetraoctylammonium *bis*(trifluoromethanesulfonyl)imide 7**

A solution of lithium *bis*(trifluoromethanesulfonyl)imide (8.78 g, 0.0306 mol) in water (50 mL) was added to a solution of tetraoctylammonium bromide (9.18 g, 0.0168 mol) in acetone/water (1/1, 100 mL). Immediately two layers formed and this reaction mixture was stirred for 24 hours. Dichloromethane (75 mL) was added and this was washed with water (10 x 100 mL). The organic layer was then concentrated under reduced pressure to give the salt **7** as a white solid (11.2 g, 0.0150 mol, 89%). m.p. 27-30 °C (lit.<sup>5</sup> 30-31 °C). <sup>1</sup>H NMR (300 MHz, CD<sub>3</sub>CN): δ 0.90 (m, 12H, NCH<sub>2</sub>CH<sub>2</sub>(CH<sub>2</sub>)<sub>5</sub>CH<sub>3</sub>), 1.31 (m, 40H, NCH<sub>2</sub>CH<sub>2</sub>(CH<sub>2</sub>)<sub>5</sub>CH<sub>3</sub>), 1.57 (m, 8H, NCH<sub>2</sub>CH<sub>2</sub>(CH<sub>2</sub>)<sub>5</sub>CH<sub>3</sub>), 3.05 (m, 8H, NCH<sub>2</sub>CH<sub>2</sub>(CH<sub>2</sub>)<sub>5</sub>CH<sub>3</sub>).

## $^1\text{H}$ NMR spectra of the ionic liquids **3-7**

### *N*-Butyl-*N*-methylpyrrolidinium *bis*(trifluoromethanesulfonyl)imide **3**

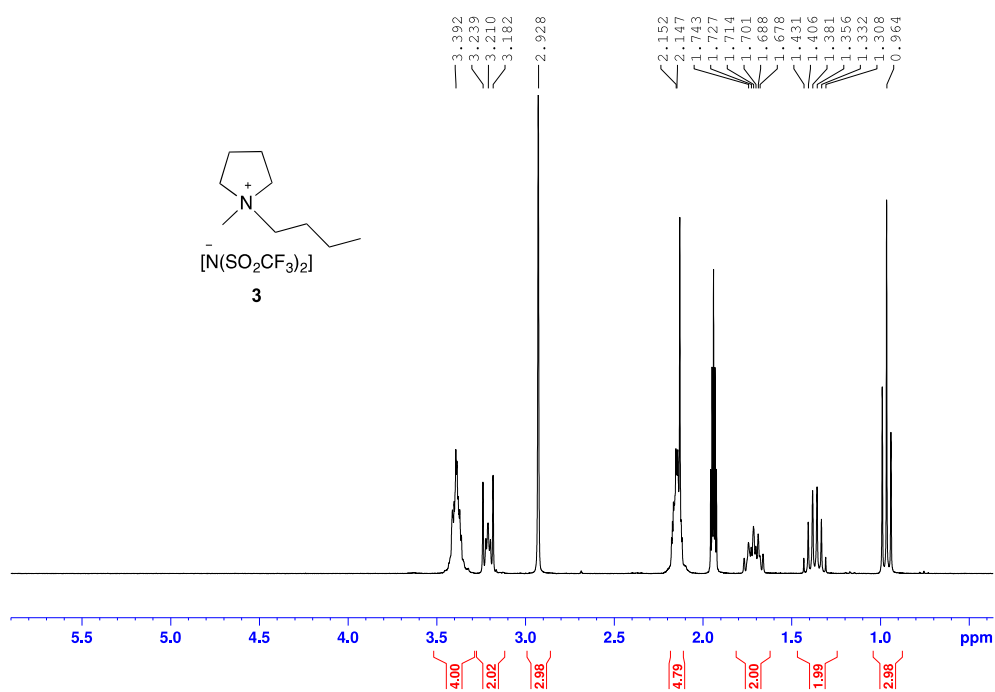

N.B. Residual solvent signal at  $\delta$  2.15.

### 1-Butyl-3-methylimidazolium *bis*(trifluoromethanesulfonyl)imide **4**

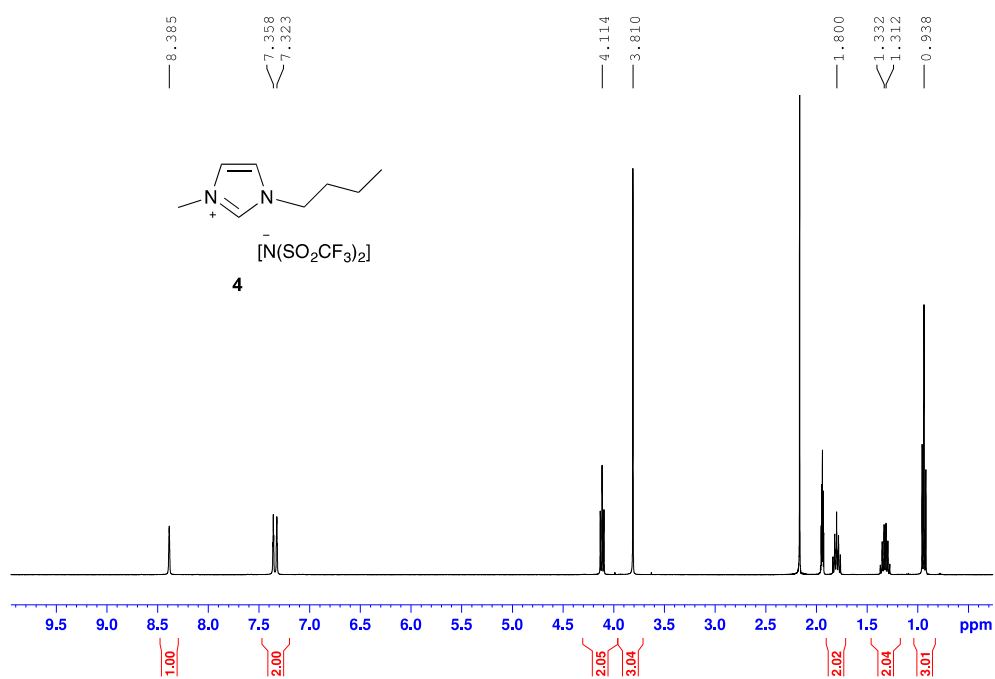

N.B. Residual solvent signal at  $\delta$  2.15.

1-Butyl-2,3-dimethylimidazolium *bis*(trifluoromethanesulfonyl)imide **5**

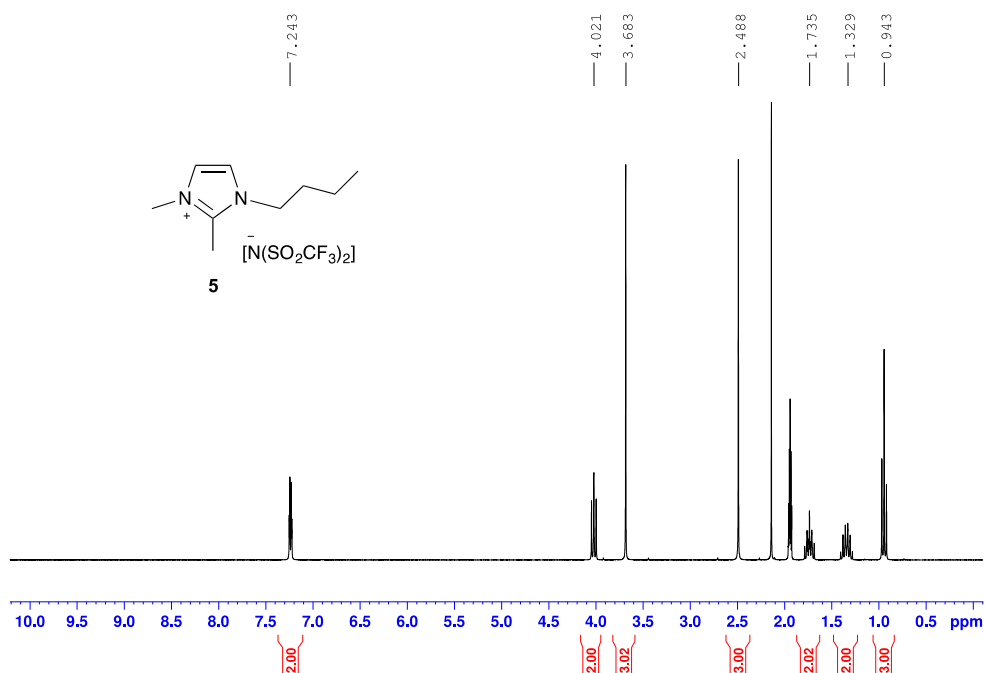

N.B. Residual solvent signal at  $\delta$  2.15.

1-Butyl-2,3,4,5-tetramethylimidazolium *bis*(trifluoromethanesulfonyl)imide **6**

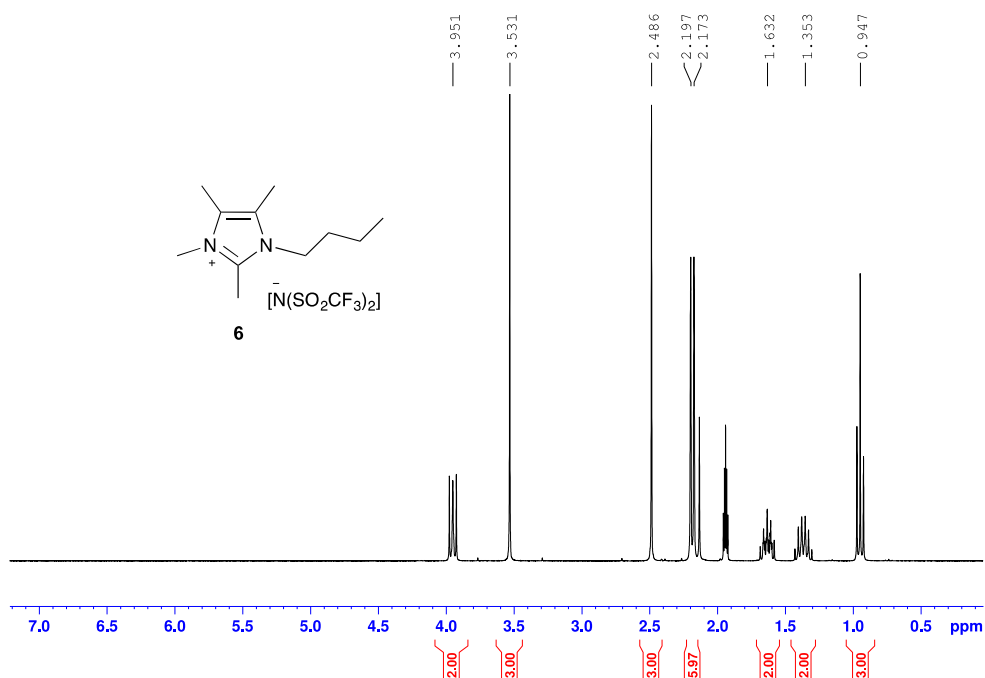

N.B. Residual solvent signal at  $\delta$  2.15.

Tetraoctylammonium *bis*(trifluoromethanesulfonyl)imide **7**

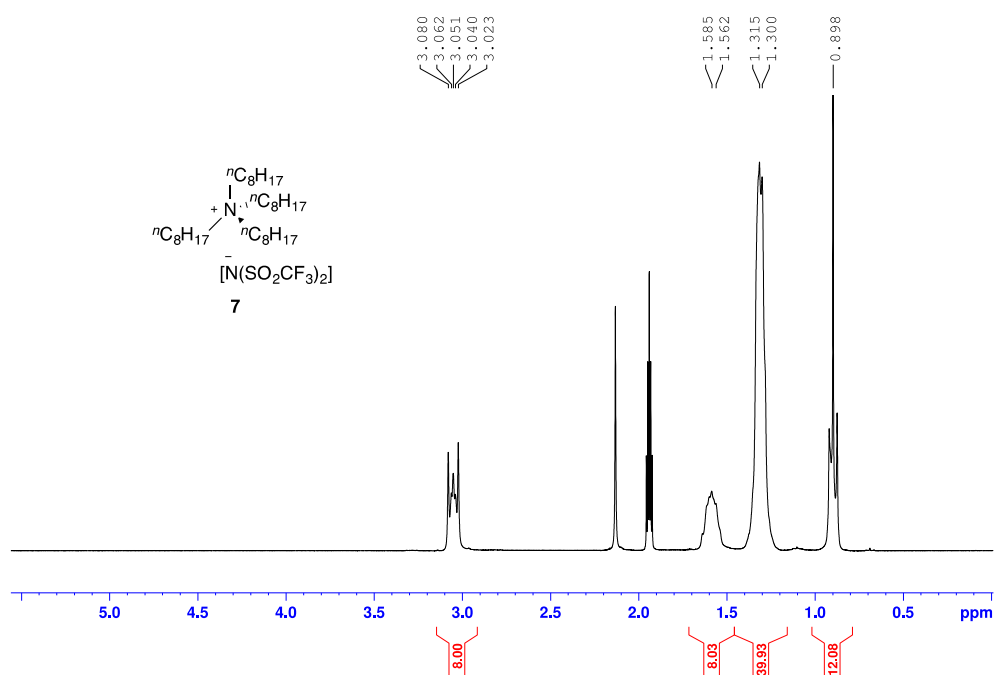

## Kinetic analyses

### **Examining the kinetics of the nucleophilic aromatic substitution reaction between the fluorodinitrobenzene **1** and ethanol, in ethanol and the ionic liquids **3-7****

To determine the rate constants of the reaction of ethanol with benzene **1** in mixtures containing different amounts of each of the ionic liquids **3-7**, standard solutions were prepared containing triethylamine (*ca.* 0.35 mol L<sup>-1</sup>) and varying concentrations of ethanol dissolved in one of the ionic liquids **3-7** to the desired mole fraction (See Tables S1-S6 for exact quantities).

To determine the activation parameters for the reaction in the molecular solvent, ethanol, a standard solution was prepared containing triethylamine (*ca.* 0.35 mol L<sup>-1</sup>) in ethanol (total volume, 10 mL). To determine the activation parameters for the ionic liquid solvents **3-7**, standard solutions were prepared containing triethylamine (*ca.* 0.35 mol L<sup>-1</sup>) and ethanol (*ca.* 0.50 mol L<sup>-1</sup>) dissolved in one of the ionic liquids **3-7** to a total volume of 10 mL (See Tables S7-S13 for exact quantities).

The probe in the NMR spectrometer was equilibrated to the desired temperature. 1-Fluoro-2,4-dinitrobenzene **1** (*ca.* 3 mg, 0.02 mmol) was added to a 5 mm NMR tube followed by an aliquot of a standard solution (0.50 mL). Reaction progress was followed using <sup>19</sup>F NMR spectroscopy to observe the depletion of the starting material **1** signal at  $\delta$  *ca.* -110. The pseudo first order rate constant ( $k_{obs}$ ) and, using the concentration of ethanol (Equation S1), the second order rate constant ( $k_2$ ) were determined from the change in integration of this signal. These data were used in the bimolecular form of the Eyring equation (Equation S2) to create an Eyring plot and calculate the activation parameters in each case.

$$k_{obs} = k_2[EtOH] \quad (S1)$$

$$\ln \left( \frac{k_2 h}{k_B R T^2} \right) = \frac{\Delta S^\ddagger}{R} - \frac{\Delta H^\ddagger}{RT} \quad (S2)$$



Rate data for the mole fraction dependence plots shown in Figures 1 and 2

**Table S1.** Masses used to prepare reaction mixtures, mole fraction of ionic liquid and concentrations of reagents in the reaction mixture, and rate constants for the reaction between 1-fluoro-2,4-dinitrobenzene **1** and ethanol (Scheme 1) in mixtures containing [bmim][N(SO<sub>2</sub>CF<sub>3</sub>)<sub>2</sub>] **4** at 324 K.

| Mole fraction |           | Masses                  |             | Concentrations                               |                                 | Rate constants                                                |                                                                                 |
|---------------|-----------|-------------------------|-------------|----------------------------------------------|---------------------------------|---------------------------------------------------------------|---------------------------------------------------------------------------------|
| IL <b>4</b>   | IL<br>/ g | NEt <sub>3</sub><br>/ g | EtOH<br>/ g | [NEt <sub>3</sub> ]<br>/ mol L <sup>-1</sup> | [EtOH]<br>/ mol L <sup>-1</sup> | <i>k</i> <sub>obs</sub><br>/ 10 <sup>-4</sup> s <sup>-1</sup> | <i>k</i> <sub>2</sub><br>/ 10 <sup>-5</sup> L mol <sup>-1</sup> s <sup>-1</sup> |
| 0             | 0         | 0.0700                  | 1.51        | 0.346                                        | 16.4                            | 1.12                                                          | 0.684                                                                           |
|               |           |                         |             |                                              |                                 | 1.32                                                          | 0.804                                                                           |
|               |           |                         |             |                                              |                                 | 0.949                                                         | 0.578                                                                           |
| 0.102         | 1.02      | 0.0706                  | 0.956       | 0.349                                        | 10.4                            | 4.06                                                          | 3.91                                                                            |
|               |           |                         |             |                                              |                                 | 3.92                                                          | 3.78                                                                            |
|               |           |                         |             |                                              |                                 | 3.84                                                          | 3.70                                                                            |
| 0.202         | 1.59      | 0.0714                  | 0.654       | 0.353                                        | 7.10                            | 4.29                                                          | 6.04                                                                            |
|               |           |                         |             |                                              |                                 | 3.78                                                          | 5.32                                                                            |
|               |           |                         |             |                                              |                                 | 4.16                                                          | 5.86                                                                            |
| 0.301         | 1.93      | 0.0714                  | 0.461       | 0.352                                        | 5.00                            | 4.22                                                          | 8.45                                                                            |
|               |           |                         |             |                                              |                                 | 4.24                                                          | 8.49                                                                            |
|               |           |                         |             |                                              |                                 | 4.13                                                          | 8.26                                                                            |
| 0.400         | 2.17      | 0.0715                  | 0.325       | 0.353                                        | 3.52                            | 4.56                                                          | 13.0                                                                            |
|               |           |                         |             |                                              |                                 | 3.99                                                          | 11.3                                                                            |
|               |           |                         |             |                                              |                                 | 3.97                                                          | 11.3                                                                            |
| 0.502         | 2.36      | 0.0715                  | 0.225       | 0.353                                        | 2.44                            | 3.81                                                          | 15.6                                                                            |
|               |           |                         |             |                                              |                                 | 4.07                                                          | 16.7                                                                            |
|               |           |                         |             |                                              |                                 | 4.24                                                          | 17.4                                                                            |
| 0.545         | 2.41      | 0.0723                  | 0.188       | 0.357                                        | 2.04                            | 4.01                                                          | 19.7                                                                            |
|               |           |                         |             |                                              |                                 | 3.92                                                          | 19.2                                                                            |
|               |           |                         |             |                                              |                                 | 3.94                                                          | 19.3                                                                            |
| 0.599         | 2.47      | 0.0711                  | 0.150       | 0.351                                        | 1.62                            | 3.75                                                          | 23.1                                                                            |
|               |           |                         |             |                                              |                                 | 3.62                                                          | 22.3                                                                            |
|               |           |                         |             |                                              |                                 | 4.21                                                          | 25.9                                                                            |
| 0.666         | 2.55      | 0.0710                  | 0.108       | 0.351                                        | 1.18                            | 3.17                                                          | 26.9                                                                            |
|               |           |                         |             |                                              |                                 | 3.29                                                          | 28.0                                                                            |
|               |           |                         |             |                                              |                                 | 2.72                                                          | 23.1                                                                            |
| 0.692         | 2.59      | 0.0740                  | 0.0927      | 0.366                                        | 1.01                            | 3.11                                                          | 30.9                                                                            |
|               |           |                         |             |                                              |                                 | 3.19                                                          | 31.7                                                                            |
|               |           |                         |             |                                              |                                 | 3.11                                                          | 30.9                                                                            |
| 0.754         | 2.64      | 0.0712                  | 0.0624      | 0.352                                        | 0.677                           | 2.70                                                          | 39.8                                                                            |
|               |           |                         |             |                                              |                                 | 2.21                                                          | 32.6                                                                            |
|               |           |                         |             |                                              |                                 | 2.52                                                          | 37.3                                                                            |
| 0.791         | 2.68      | 0.0710                  | 0.0451      | 0.351                                        | 0.489                           | 2.25                                                          | 45.9                                                                            |
|               |           |                         |             |                                              |                                 | 2.01                                                          | 41.2                                                                            |
|               |           |                         |             |                                              |                                 | 2.15                                                          | 43.9                                                                            |
| 0.801         | 2.69      | 0.0697                  | 0.0416      | 0.344                                        | 0.452                           | 1.85                                                          | 41.1                                                                            |
|               |           |                         |             |                                              |                                 | 1.96                                                          | 43.4                                                                            |
|               |           |                         |             |                                              |                                 | 1.58                                                          | 35.0                                                                            |

**Table S2.** Masses used to prepare reaction mixtures, mole fraction of ionic liquid and concentrations of reagents in the reaction mixture, and rate constants for the reaction between 1-fluoro-2,4-dinitrobenzene **1** and ethanol (Scheme 1) in mixtures containing [bmpyr][N(SO<sub>2</sub>CF<sub>3</sub>)<sub>2</sub>] **3** at 324 K.

| Mole fraction<br>IL <b>3</b> | Masses    |                         |             | Concentrations                               |                                 | Rate constants                                         |                                                                 |
|------------------------------|-----------|-------------------------|-------------|----------------------------------------------|---------------------------------|--------------------------------------------------------|-----------------------------------------------------------------|
|                              | IL<br>/ g | NEt <sub>3</sub><br>/ g | EtOH<br>/ g | [NEt <sub>3</sub> ]<br>/ mol L <sup>-1</sup> | [EtOH]<br>/ mol L <sup>-1</sup> | $k_{\text{obs}}$<br>/ 10 <sup>-4</sup> s <sup>-1</sup> | $k_2$<br>/ 10 <sup>-5</sup> L mol <sup>-1</sup> s <sup>-1</sup> |
| 0.104                        | 1.03      | 0.0717                  | 0.931       | 0.354                                        | 10.1                            | 4.54                                                   | 4.49                                                            |
|                              |           |                         |             |                                              |                                 | 5.19                                                   | 5.13                                                            |
|                              |           |                         |             |                                              |                                 | 4.62                                                   | 4.58                                                            |
| 0.198                        | 1.54      | 0.0719                  | 0.645       | 0.355                                        | 7.00                            | 3.89                                                   | 5.56                                                            |
|                              |           |                         |             |                                              |                                 | 4.04                                                   | 5.77                                                            |
|                              |           |                         |             |                                              |                                 | 3.80                                                   | 5.43                                                            |
| 0.306                        | 1.91      | 0.0713                  | 0.440       | 0.352                                        | 4.78                            | 4.78                                                   | 10.0                                                            |
|                              |           |                         |             |                                              |                                 | 4.52                                                   | 9.46                                                            |
|                              |           |                         |             |                                              |                                 | 5.00                                                   | 10.5                                                            |
| 0.394                        | 2.11      | 0.0718                  | 0.321       | 0.355                                        | 3.48                            | 4.09                                                   | 11.7                                                            |
|                              |           |                         |             |                                              |                                 | 4.21                                                   | 12.1                                                            |
|                              |           |                         |             |                                              |                                 | 4.30                                                   | 12.3                                                            |
| 0.501                        | 2.29      | 0.0712                  | 0.217       | 0.352                                        | 2.35                            | 4.53                                                   | 19.3                                                            |
|                              |           |                         |             |                                              |                                 | 4.59                                                   | 19.5                                                            |
|                              |           |                         |             |                                              |                                 | 4.66                                                   | 19.8                                                            |
| 0.546                        | 2.36      | 0.0717                  | 0.181       | 0.354                                        | 1.97                            | 4.03                                                   | 20.5                                                            |
|                              |           |                         |             |                                              |                                 | 4.33                                                   | 23.3                                                            |
| 0.594                        | 2.41      | 0.0699                  | 0.148       | 0.354                                        | 1.61                            | 3.92                                                   | 24.4                                                            |
|                              |           |                         |             |                                              |                                 | 4.12                                                   | 25.7                                                            |
|                              |           |                         |             |                                              |                                 | 4.42                                                   | 27.5                                                            |
| 0.665                        | 2.49      | 0.0703                  | 0.105       | 0.347                                        | 1.14                            | 4.01                                                   | 35.1                                                            |
|                              |           |                         |             |                                              |                                 | 4.59                                                   | 40.2                                                            |
|                              |           |                         |             |                                              |                                 | 3.33                                                   | 29.1                                                            |
| 0.688                        | 2.53      | 0.0711                  | 0.0925      | 0.351                                        | 1.00                            | 4.07                                                   | 40.5                                                            |
|                              |           |                         |             |                                              |                                 | 3.61                                                   | 35.9                                                            |
|                              |           |                         |             |                                              |                                 | 3.50                                                   | 34.8                                                            |
| 0.745                        | 2.56      | 0.0713                  | 0.0630      | 0.352                                        | 0.684                           | 3.01                                                   | 43.9                                                            |
|                              |           |                         |             |                                              |                                 | 2.26                                                   | 33.1                                                            |
|                              |           |                         |             |                                              |                                 | 2.25                                                   | 32.9                                                            |
| 0.745                        | 2.56      | 0.0705                  | 0.0645      | 0.348                                        | 0.700                           | 3.18                                                   | 45.4                                                            |
|                              |           |                         |             |                                              |                                 | 2.85                                                   | 40.7                                                            |
| 0.785                        | 2.57      | 0.0708                  | 0.0446      | 0.350                                        | 0.484                           | 2.46                                                   | 50.9                                                            |
|                              |           |                         |             |                                              |                                 | 2.48                                                   | 51.2                                                            |
| 0.785 <sup>i</sup>           | 12.9      | 0.341                   | 0.218       | 0.337                                        | 0.472                           | 2.31                                                   | 48.9                                                            |
|                              |           |                         |             |                                              |                                 | 2.10                                                   | 44.5                                                            |

<sup>i</sup> Duplicate mole fraction as these data are a subset of the temperature dependent data; solution was prepared to 10 mL rather than 2 mL.

**Table S3.** Masses used to prepare reaction mixtures, mole fraction of ionic liquid and concentrations of reagents in the reaction mixture, and rate constants for the reaction between 1-fluoro-2,4-dinitrobenzene **1** and ethanol (Scheme 1) in mixtures containing [bm<sub>2</sub>im][N(SO<sub>2</sub>CF<sub>3</sub>)<sub>2</sub>] **5** at 324 K.

| Mole fraction<br>IL <b>5</b> | Masses    |                         |             | Concentrations                               |                                 | Rate constants                                                |                                                                                 |
|------------------------------|-----------|-------------------------|-------------|----------------------------------------------|---------------------------------|---------------------------------------------------------------|---------------------------------------------------------------------------------|
|                              | IL<br>/ g | NEt <sub>3</sub><br>/ g | EtOH<br>/ g | [NEt <sub>3</sub> ]<br>/ mol L <sup>-1</sup> | [EtOH]<br>/ mol L <sup>-1</sup> | <i>k</i> <sub>obs</sub><br>/ 10 <sup>-4</sup> s <sup>-1</sup> | <i>k</i> <sub>2</sub><br>/ 10 <sup>-5</sup> L mol <sup>-1</sup> s <sup>-1</sup> |
| 0.0730                       | 0.774     | 0.0707                  | 1.01        | 0.349                                        | 10.9                            | 4.13                                                          | 3.77                                                                            |
|                              |           |                         |             |                                              |                                 | 5.41                                                          | 4.94                                                                            |
|                              |           |                         |             |                                              |                                 | 3.98                                                          | 3.63                                                                            |
| 0.142                        | 1.23      | 0.0700                  | 0.758       | 0.346                                        | 8.23                            | 5.11                                                          | 6.21                                                                            |
|                              |           |                         |             |                                              |                                 | 5.62                                                          | 6.83                                                                            |
|                              |           |                         |             |                                              |                                 | 5.21                                                          | 6.33                                                                            |
| 0.241                        | 1.65      | 0.0716                  | 0.520       | 0.354                                        | 5.65                            | 4.80                                                          | 8.50                                                                            |
|                              |           |                         |             |                                              |                                 | 3.70                                                          | 6.56                                                                            |
|                              |           |                         |             |                                              |                                 | 5.58                                                          | 9.89                                                                            |
| 0.341                        | 1.94      | 0.0703                  | 0.366       | 0.347                                        | 3.97                            | 4.86                                                          | 12.3                                                                            |
|                              |           |                         |             |                                              |                                 | 5.14                                                          | 12.9                                                                            |
|                              |           |                         |             |                                              |                                 | 4.83                                                          | 12.1                                                                            |
| 0.351                        | 2.04      | 0.0704                  | 0.368       | 0.348                                        | 4.00                            | 4.73                                                          | 11.8                                                                            |
|                              |           |                         |             |                                              |                                 | 4.75                                                          | 11.9                                                                            |
|                              |           |                         |             |                                              |                                 | 4.04                                                          | 15.5                                                                            |
| 0.461                        | 2.19      | 0.0710                  | 0.240       | 0.351                                        | 2.61                            | 5.00                                                          | 19.2                                                                            |
|                              |           |                         |             |                                              |                                 | 4.89                                                          | 18.8                                                                            |
|                              |           |                         |             |                                              |                                 | 5.20                                                          | 24.6                                                                            |
| 0.527                        | 2.37      | 0.0698                  | 0.194       | 0.345                                        | 2.11                            | 4.87                                                          | 23.2                                                                            |
|                              |           |                         |             |                                              |                                 | 4.94                                                          | 23.4                                                                            |
|                              |           |                         |             |                                              |                                 | 5.53                                                          | 31.8                                                                            |
| 0.569                        | 2.40      | 0.0725                  | 0.160       | 0.358                                        | 1.74                            | 5.35                                                          | 30.8                                                                            |
|                              |           |                         |             |                                              |                                 | 5.39                                                          | 31.2                                                                            |
|                              |           |                         |             |                                              |                                 | 3.96                                                          | 23.0                                                                            |
| 0.571                        | 2.41      | 0.0739                  | 0.159       | 0.365                                        | 1.72                            | 3.38                                                          | 19.6                                                                            |
|                              |           |                         |             |                                              |                                 | 5.61                                                          | 42.4                                                                            |
|                              |           |                         |             |                                              |                                 | 4.85                                                          | 36.7                                                                            |
| 0.618                        | 2.37      | 0.0733                  | 0.122       | 0.362                                        | 1.32                            | 6.25                                                          | 47.2                                                                            |
|                              |           |                         |             |                                              |                                 | 4.02                                                          | 48.8                                                                            |
|                              |           |                         |             |                                              |                                 | 4.09                                                          | 49.7                                                                            |
| 0.705                        | 2.44      | 0.0722                  | 0.0758      | 0.357                                        | 0.823                           | 4.24                                                          | 51.6                                                                            |
|                              |           |                         |             |                                              |                                 | 2.29                                                          | 68.5                                                                            |
|                              |           |                         |             |                                              |                                 | 2.27                                                          | 67.7                                                                            |
| 0.817 <sup>ii</sup>          | 13.2      | 0.350                   | 0.154       | 0.346                                        | 0.335                           | 2.19                                                          | 65.4                                                                            |
|                              |           |                         |             |                                              |                                 |                                                               |                                                                                 |

<sup>ii</sup>These data are a subset of the temperature dependent data; solution was prepared to 10 mL rather than 2 mL.

**Table S4.** Masses used to prepare reaction mixtures, mole fraction of ionic liquid and concentrations of reagents in the reaction mixture, and rate constants for the reaction between 1-fluoro-2,4-dinitrobenzene **1** and ethanol (Scheme 1) in mixtures containing [bm<sub>4</sub>im][N(SO<sub>2</sub>CF<sub>3</sub>)<sub>2</sub>] **6** at 324 K.

| Mole fraction<br>IL <b>6</b> | Masses    |                         |             | Concentrations                               |                                 | Rate constants                                                |                                                                                 |
|------------------------------|-----------|-------------------------|-------------|----------------------------------------------|---------------------------------|---------------------------------------------------------------|---------------------------------------------------------------------------------|
|                              | IL<br>/ g | NEt <sub>3</sub><br>/ g | EtOH<br>/ g | [NEt <sub>3</sub> ]<br>/ mol L <sup>-1</sup> | [EtOH]<br>/ mol L <sup>-1</sup> | <i>k</i> <sub>obs</sub><br>/ 10 <sup>-4</sup> s <sup>-1</sup> | <i>k</i> <sub>2</sub><br>/ 10 <sup>-5</sup> L mol <sup>-1</sup> s <sup>-1</sup> |
| 0.102                        | 1.06      | 0.0700                  | 0.902       | 0.346                                        | 9.79                            | 4.60                                                          | 4.70                                                                            |
|                              |           |                         |             |                                              |                                 | 4.24                                                          | 4.32                                                                            |
|                              |           |                         |             |                                              |                                 | 4.53                                                          | 4.63                                                                            |
| 0.212                        | 1.65      | 0.0680                  | 0.584       | 0.336                                        | 6.33                            | 4.75                                                          | 7.50                                                                            |
|                              |           |                         |             |                                              |                                 | 4.63                                                          | 7.30                                                                            |
|                              |           |                         |             |                                              |                                 | 4.96                                                          | 7.84                                                                            |
| 0.295                        | 1.90      | 0.0700                  | 0.420       | 0.346                                        | 4.56                            | 5.77                                                          | 12.7                                                                            |
|                              |           |                         |             |                                              |                                 | 4.52                                                          | 9.91                                                                            |
|                              |           |                         |             |                                              |                                 | 3.81                                                          | 8.36                                                                            |
| 0.408                        | 2.17      | 0.0652                  | 0.285       | 0.322                                        | 3.09                            | 5.21                                                          | 16.9                                                                            |
|                              |           |                         |             |                                              |                                 | 4.88                                                          | 15.8                                                                            |
|                              |           |                         |             |                                              |                                 | 4.52                                                          | 14.6                                                                            |
| 0.486                        | 2.25      | 0.0700                  | 0.205       | 0.346                                        | 2.23                            | 5.66                                                          | 26.5                                                                            |
|                              |           |                         |             |                                              |                                 | 5.27                                                          | 24.7                                                                            |
|                              |           |                         |             |                                              |                                 | 5.40                                                          | 25.3                                                                            |
| 0.499                        | 2.29      | 0.0716                  | 0.197       | 0.354                                        | 2.14                            | 6.00                                                          | 28.1                                                                            |
|                              |           |                         |             |                                              |                                 | 5.54                                                          | 25.9                                                                            |
| 0.603                        | 2.42      | 0.0688                  | 0.128       | 0.340                                        | 1.38                            | 5.03                                                          | 36.4                                                                            |
|                              |           |                         |             |                                              |                                 | 4.88                                                          | 35.3                                                                            |
|                              |           |                         |             |                                              |                                 | 4.83                                                          | 34.9                                                                            |
| 0.689                        | 2.45      | 0.0727                  | 0.0773      | 0.359                                        | 0.839                           | 4.57                                                          | 54.4                                                                            |
|                              |           |                         |             |                                              |                                 | 4.21                                                          | 50.1                                                                            |
|                              |           |                         |             |                                              |                                 | 4.13                                                          | 49.2                                                                            |
| 0.694                        | 2.50      | 0.0724                  | 0.0767      | 0.358                                        | 0.832                           | 4.61                                                          | 55.4                                                                            |
|                              |           |                         |             |                                              |                                 | 4.80                                                          | 57.7                                                                            |
| 0.795                        | 2.56      | 0.0768                  | 0.0311      | 0.379                                        | 0.338                           | 2.04                                                          | 60.4                                                                            |
|                              |           |                         |             |                                              |                                 | 2.06                                                          | 60.9                                                                            |
| 0.798                        | 2.52      | 0.0700                  | 0.0320      | 0.346                                        | 0.347                           | 2.61                                                          | 75.1                                                                            |
|                              |           |                         |             |                                              |                                 | 2.79                                                          | 80.3                                                                            |
|                              |           |                         |             |                                              |                                 | 2.48                                                          | 71.3                                                                            |
| 0.793 <sup>iii</sup>         | 12.7      | 0.340                   | 0.176       | 0.336                                        | 0.382                           | 2.70                                                          | 70.8                                                                            |
|                              |           |                         |             |                                              |                                 | 2.86                                                          | 74.9                                                                            |
|                              |           |                         |             |                                              |                                 | 2.38                                                          | 62.4                                                                            |

<sup>iii</sup> Duplicate mole fraction as these data are a subset of the temperature dependent data; solution was prepared to 10 mL rather than 2 mL.

**Table S5.** Masses used to prepare reaction mixtures, mole fraction of ionic liquid and concentrations of reagents in the reaction mixture, and rate constants for the reaction between 1-fluoro-2,4-dinitrobenzene **1** and ethanol (Scheme 1) in mixtures containing [TOA][N(SO<sub>2</sub>CF<sub>3</sub>)<sub>2</sub>] **7** at 324 K.

| Mole fraction<br>IL <b>7</b> | Masses    |                         |             | Concentrations                               |                                 | Rate constants                                                |                                                                                 |
|------------------------------|-----------|-------------------------|-------------|----------------------------------------------|---------------------------------|---------------------------------------------------------------|---------------------------------------------------------------------------------|
|                              | IL<br>/ g | NEt <sub>3</sub><br>/ g | EtOH<br>/ g | [NEt <sub>3</sub> ]<br>/ mol L <sup>-1</sup> | [EtOH]<br>/ mol L <sup>-1</sup> | <i>k</i> <sub>obs</sub><br>/ 10 <sup>-4</sup> s <sup>-1</sup> | <i>k</i> <sub>2</sub><br>/ 10 <sup>-5</sup> L mol <sup>-1</sup> s <sup>-1</sup> |
| 0.071                        | 0.994     | 0.0723                  | 0.775       | 0.357                                        | 8.41                            | 4.36                                                          | 5.18                                                                            |
|                              |           |                         |             |                                              |                                 | 3.60                                                          | 4.28                                                                            |
|                              |           |                         |             |                                              |                                 | 3.28                                                          | 3.89                                                                            |
| 0.148                        | 1.40      | 0.0730                  | 0.464       | 0.361                                        | 5.03                            | 5.34                                                          | 10.6                                                                            |
|                              |           |                         |             |                                              |                                 | 5.48                                                          | 10.9                                                                            |
|                              |           |                         |             |                                              |                                 | 5.49                                                          | 10.9                                                                            |
| 0.220                        | 1.52      | 0.0704                  | 0.301       | 0.348                                        | 3.27                            | 4.57                                                          | 14.0                                                                            |
|                              |           |                         |             |                                              |                                 | 6.18                                                          | 18.9                                                                            |
|                              |           |                         |             |                                              |                                 | 5.06                                                          | 15.5                                                                            |
| 0.308                        | 1.67      | 0.0715                  | 0.198       | 0.353                                        | 2.15                            | 6.10                                                          | 28.4                                                                            |
|                              |           |                         |             |                                              |                                 | 4.77                                                          | 22.2                                                                            |
|                              |           |                         |             |                                              |                                 | 6.15                                                          | 28.7                                                                            |
| 0.374                        | 1.82      | 0.0720                  | 0.155       | 0.356                                        | 1.69                            | 4.78                                                          | 28.4                                                                            |
|                              |           |                         |             |                                              |                                 | 4.98                                                          | 29.5                                                                            |
|                              |           |                         |             |                                              |                                 | 2.79                                                          | 16.5                                                                            |
| 0.442                        | 1.88      | 0.0711                  | 0.114       | 0.351                                        | 1.24                            | 3.81                                                          | 30.9                                                                            |
|                              |           |                         |             |                                              |                                 | 5.62                                                          | 45.5                                                                            |
|                              |           |                         |             |                                              |                                 | 6.75                                                          | 54.6                                                                            |
| 0.510                        | 1.92      | 0.0712                  | 0.0810      | 0.352                                        | 0.879                           | 4.33                                                          | 49.3                                                                            |
|                              |           |                         |             |                                              |                                 | 4.37                                                          | 49.7                                                                            |
|                              |           |                         |             |                                              |                                 | 4.86                                                          | 55.2                                                                            |
| 0.583                        | 1.86      | 0.0711                  | 0.0496      | 0.351                                        | 0.538                           | 3.43                                                          | 63.8                                                                            |
|                              |           |                         |             |                                              |                                 | 3.93                                                          | 73.0                                                                            |
|                              |           |                         |             |                                              |                                 | 3.92                                                          | 72.9                                                                            |
| 0.661 <sup>iv</sup>          | 9.85      | 0.300                   | 0.174       | 0.297                                        | 0.379                           | 3.23                                                          | 85.3                                                                            |
|                              |           |                         |             |                                              |                                 | 3.51                                                          | 92.7                                                                            |
|                              |           |                         |             |                                              |                                 | 3.25                                                          | 85.8                                                                            |

<sup>iv</sup> These data are a subset of the temperature dependent data; solution was prepared to 10 mL rather than 2 mL.

**Table S6.** Masses used to prepare reaction mixtures, mole fraction of ionic liquid and concentrations of reagents in the reaction mixture, and rate constants for the reaction between 1-fluoro-2,4-dinitrobenzene **1** and ethanol (Scheme 1) in mixtures containing Li[N(SO<sub>2</sub>CF<sub>3</sub>)<sub>2</sub>] at 324 K.

| Mole fraction<br>SALT | Masses      |                         |             | Concentrations                               |                                 | Rate constants                                                |                                                                                 |
|-----------------------|-------------|-------------------------|-------------|----------------------------------------------|---------------------------------|---------------------------------------------------------------|---------------------------------------------------------------------------------|
|                       | SALT<br>/ g | NEt <sub>3</sub><br>/ g | EtOH<br>/ g | [NEt <sub>3</sub> ]<br>/ mol L <sup>-1</sup> | [EtOH]<br>/ mol L <sup>-1</sup> | <i>k</i> <sub>obs</sub><br>/ 10 <sup>-4</sup> s <sup>-1</sup> | <i>k</i> <sub>2</sub><br>/ 10 <sup>-5</sup> L mol <sup>-1</sup> s <sup>-1</sup> |
| 0.014                 | 0.130       | 0.0706                  | 1.44        | 0.349                                        | 15.7                            | 3.49                                                          | 2.23                                                                            |
|                       |             |                         |             |                                              |                                 | 3.41                                                          | 2.18                                                                            |
|                       |             |                         |             |                                              |                                 | 4.00                                                          | 2.55                                                                            |
| 0.033                 | 0.300       | 0.0767                  | 1.37        | 0.379                                        | 14.9                            | 7.03                                                          | 4.72                                                                            |
|                       |             |                         |             |                                              |                                 | 8.67                                                          | 5.82                                                                            |
|                       |             |                         |             |                                              |                                 | 9.58                                                          | 6.43                                                                            |
| 0.055                 | 0.488       | 0.0740                  | 1.30        | 0.366                                        | 14.1                            | 25.8                                                          | 18.3                                                                            |
|                       |             |                         |             |                                              |                                 | 12.5                                                          | 8.88                                                                            |
|                       |             |                         |             |                                              |                                 | 14.2                                                          | 10.1                                                                            |
| 0.089                 | 0.778       | 0.0883                  | 1.23        | 0.436                                        | 13.4                            | 37.2                                                          | 27.8                                                                            |
|                       |             |                         |             |                                              |                                 | 24.9                                                          | 18.6                                                                            |
|                       |             |                         |             |                                              |                                 | 20.7                                                          | 15.5                                                                            |
| 0.122                 | 0.987       | 0.0746                  | 1.10        | 0.369                                        | 12.0                            | 34.1                                                          | 28.4                                                                            |
|                       |             |                         |             |                                              |                                 | 32.4                                                          | 27.1                                                                            |
|                       |             |                         |             |                                              |                                 | 24.9                                                          | 20.7                                                                            |
| 0.155 <sup>v</sup>    | 5.90        | 0.350                   | 5.00        | 0.346                                        | 10.9                            | 37.2                                                          | 34.3                                                                            |
|                       |             |                         |             |                                              |                                 | 34.5                                                          | 31.8                                                                            |
|                       |             |                         |             |                                              |                                 | 31.9                                                          | 29.4                                                                            |

<sup>v</sup> These data are a subset of the temperature dependent data; solution was prepared to 10 mL rather than 2 mL.

Eyring plot for the data shown in Table 2 in the main text

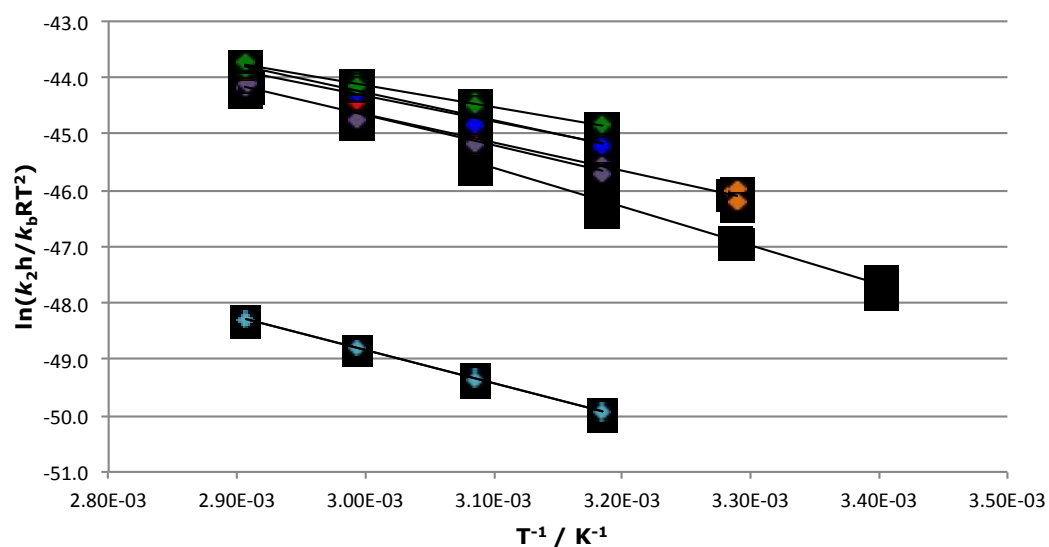

**Figure S1.** The Eyring plot for the reaction between 1-fluoro-2,4-dinitrobenzene **1** and ethanol in mixtures containing either no added salt ( $\blacklozenge$ ), [bmpyr][N(SO<sub>2</sub>CF<sub>3</sub>)<sub>2</sub>] **3** ( $\blacklozenge$ ), [bmim][N(SO<sub>2</sub>CF<sub>3</sub>)<sub>2</sub>] **4** ( $\blacklozenge$ ), [bm<sub>2</sub>im][N(SO<sub>2</sub>CF<sub>3</sub>)<sub>2</sub>] **5** ( $\blacklozenge$ ), [bm<sub>4</sub>im][N(SO<sub>2</sub>CF<sub>3</sub>)<sub>2</sub>] **6** ( $\blacklozenge$ ), [TOA][N(SO<sub>2</sub>CF<sub>3</sub>)<sub>2</sub>] **7** ( $\blacklozenge$ ) or Li[N(SO<sub>2</sub>CF<sub>3</sub>)<sub>2</sub>] ( $\blacklozenge$ ) at the highest mole fraction used.

Rate data for the Eyring plot shown in Figure S1

**Table S7.** Masses used to prepare reaction mixtures, concentrations of reagents in the reaction mixture, and rate constants for the reaction between 1-fluoro-2,4-dinitrobenzene **1** and ethanol (Scheme 1) in ethanol.

| Masses    |                         |             | Concentrations                               |                                 | Temperature<br>/ K | Rate constants                                                |                                                                                 |
|-----------|-------------------------|-------------|----------------------------------------------|---------------------------------|--------------------|---------------------------------------------------------------|---------------------------------------------------------------------------------|
| IL<br>/ g | NEt <sub>3</sub><br>/ g | EtOH<br>/ g | [NEt <sub>3</sub> ]<br>/ mol L <sup>-1</sup> | [EtOH]<br>/ mol L <sup>-1</sup> |                    | <i>k</i> <sub>obs</sub><br>/ 10 <sup>-5</sup> s <sup>-1</sup> | <i>k</i> <sub>2</sub><br>/ 10 <sup>-5</sup> L mol <sup>-1</sup> s <sup>-1</sup> |
| 0         | 0.350                   | 7.54        | 0.346                                        | 16.4                            | 314.0              | 5.93                                                          | 0.363                                                                           |
|           |                         |             |                                              |                                 | 314.0              | 5.60                                                          | 0.342                                                                           |
|           |                         |             |                                              |                                 | 314.0              | 5.74                                                          | 0.351                                                                           |
|           |                         |             |                                              |                                 | 324.0              | 11.5                                                          | 0.701                                                                           |
|           |                         |             |                                              |                                 | 324.0              | 11.3                                                          | 0.691                                                                           |
|           |                         |             |                                              |                                 | 324.0              | 10.8                                                          | 0.658                                                                           |
|           |                         |             |                                              |                                 | 334.0              | 20.0                                                          | 1.22                                                                            |
|           |                         |             |                                              |                                 | 334.0              | 20.1                                                          | 1.23                                                                            |
|           |                         |             |                                              |                                 | 334.0              | 20.3                                                          | 1.24                                                                            |
|           |                         |             |                                              |                                 | 344.0              | 36.3                                                          | 2.22                                                                            |
|           |                         |             |                                              |                                 | 344.0              | 35.5                                                          | 2.17                                                                            |
|           |                         |             |                                              |                                 | 344.0              | 35.4                                                          | 2.16                                                                            |

**Table S8.** Masses used to prepare reaction mixtures, concentrations of reagents in the reaction mixture, and rate constants for the reaction between 1-fluoro-2,4-dinitrobenzene **1** and ethanol (Scheme 1) in [bmim][N(SO<sub>2</sub>CF<sub>3</sub>)<sub>2</sub>] **4** ( $\chi_{IL} = 0.796$ ).

| Masses    |                         |             | Concentrations                               |                                 | Temperature<br>/ K | Rate constants                                                |                                                                                 |
|-----------|-------------------------|-------------|----------------------------------------------|---------------------------------|--------------------|---------------------------------------------------------------|---------------------------------------------------------------------------------|
| IL<br>/ g | NEt <sub>3</sub><br>/ g | EtOH<br>/ g | [NEt <sub>3</sub> ]<br>/ mol L <sup>-1</sup> | [EtOH]<br>/ mol L <sup>-1</sup> |                    | <i>k</i> <sub>obs</sub><br>/ 10 <sup>-4</sup> s <sup>-1</sup> | <i>k</i> <sub>2</sub><br>/ 10 <sup>-4</sup> L mol <sup>-1</sup> s <sup>-1</sup> |
| 13.2      | 0.352                   | 0.214       | 0.346                                        | 0.465                           | 314.0              | 1.29                                                          | 2.77                                                                            |
|           |                         |             |                                              |                                 | 314.1              | 1.18                                                          | 2.53                                                                            |
|           |                         |             |                                              |                                 | 314.0              | 1.10                                                          | 2.37                                                                            |
|           |                         |             |                                              |                                 | 324.1              | 2.33                                                          | 5.01                                                                            |
|           |                         |             |                                              |                                 | 324.1              | 1.96                                                          | 4.23                                                                            |
|           |                         |             |                                              |                                 | 324.0              | 2.05                                                          | 4.41                                                                            |
|           |                         |             |                                              |                                 | 334.0              | 4.15                                                          | 8.93                                                                            |
|           |                         |             |                                              |                                 | 334.0              | 3.65                                                          | 7.86                                                                            |
|           |                         |             |                                              |                                 | 334.0              | 3.26                                                          | 7.01                                                                            |
|           |                         |             |                                              |                                 | 344.1              | 6.43                                                          | 13.8                                                                            |
|           |                         |             |                                              |                                 | 344.1              | 6.05                                                          | 13.0                                                                            |
|           |                         |             |                                              |                                 | 343.9              | 6.54                                                          | 14.1                                                                            |



**Table S9.** Masses used to prepare reaction mixtures, concentrations of reagents in the reaction mixture, and rate constants for the reaction between 1-fluoro-2,4-dinitrobenzene **1** and ethanol (Scheme 1) in [bmpyr][N(SO<sub>2</sub>CF<sub>3</sub>)<sub>2</sub>] **3** ( $\chi_{IL} = 0.784$ ).

| Masses    |                         |             | Concentrations                               |                                 | Temperature<br>/ K | Rate constants                                  |                                                                 |
|-----------|-------------------------|-------------|----------------------------------------------|---------------------------------|--------------------|-------------------------------------------------|-----------------------------------------------------------------|
| IL<br>/ g | NEt <sub>3</sub><br>/ g | EtOH<br>/ g | [NEt <sub>3</sub> ]<br>/ mol L <sup>-1</sup> | [EtOH]<br>/ mol L <sup>-1</sup> |                    | $k_{obs}$<br>/ 10 <sup>-4</sup> s <sup>-1</sup> | $k_2$<br>/ 10 <sup>-4</sup> L mol <sup>-1</sup> s <sup>-1</sup> |
| 12.9      | 0.341                   | 0.22        | 0.337                                        | 0.472                           | 304.3              | 0.786                                           | 1.66                                                            |
|           |                         |             |                                              |                                 | 304.0              | 0.809                                           | 1.71                                                            |
|           |                         |             |                                              |                                 | 304.0              | 0.658                                           | 1.39                                                            |
|           |                         |             |                                              |                                 | 314.0              | 1.14                                            | 2.40                                                            |
|           |                         |             |                                              |                                 | 314.0              | 1.36                                            | 2.89                                                            |
|           |                         |             |                                              |                                 | 314.0              | 1.31                                            | 2.78                                                            |
|           |                         |             |                                              |                                 | 324.0              | 1.86                                            | 3.94                                                            |
|           |                         |             |                                              |                                 | 324.0              | 2.25                                            | 4.76                                                            |
|           |                         |             |                                              |                                 | 334.0              | 4.29                                            | 9.08                                                            |
|           |                         |             |                                              |                                 | 334.0              | 4.43                                            | 9.37                                                            |
|           |                         |             |                                              |                                 | 334.0              | 4.02                                            | 8.51                                                            |

**Table S10.** Masses used to prepare reaction mixtures, concentrations of reagents in the reaction mixture, and rate constants for the reaction between 1-fluoro-2,4-dinitrobenzene **1** and ethanol (Scheme 1) in [bm<sub>2</sub>im][N(SO<sub>2</sub>CF<sub>3</sub>)<sub>2</sub>] **5** ( $\chi_{IL} = 0.811$ ).

| Masses    |                         |             | Concentrations                               |                                 | Temperature<br>/ K | Rate constants                                  |                                                                 |
|-----------|-------------------------|-------------|----------------------------------------------|---------------------------------|--------------------|-------------------------------------------------|-----------------------------------------------------------------|
| IL<br>/ g | NEt <sub>3</sub><br>/ g | EtOH<br>/ g | [NEt <sub>3</sub> ]<br>/ mol L <sup>-1</sup> | [EtOH]<br>/ mol L <sup>-1</sup> |                    | $k_{obs}$<br>/ 10 <sup>-4</sup> s <sup>-1</sup> | $k_2$<br>/ 10 <sup>-4</sup> L mol <sup>-1</sup> s <sup>-1</sup> |
| 13.2      | 0.350                   | 0.154       | 0.346                                        | 0.335                           | 314.1              | 1.46                                            | 4.36                                                            |
|           |                         |             |                                              |                                 | 314.0              | 1.43                                            | 4.27                                                            |
|           |                         |             |                                              |                                 | 314.0              | 1.44                                            | 4.30                                                            |
|           |                         |             |                                              |                                 | 324.1              | 1.96                                            | 5.85                                                            |
|           |                         |             |                                              |                                 | 324.0              | 2.27                                            | 6.78                                                            |
|           |                         |             |                                              |                                 | 324.0              | 2.29                                            | 6.85                                                            |
|           |                         |             |                                              |                                 | 334.0              | 3.88                                            | 11.6                                                            |
|           |                         |             |                                              |                                 | 334.0              | 4.00                                            | 12.0                                                            |
|           |                         |             |                                              |                                 | 334.0              | 3.36                                            | 10.0                                                            |
|           |                         |             |                                              |                                 | 344.0              | 6.03                                            | 18.0                                                            |
|           |                         |             |                                              |                                 | 344.1              | 5.96                                            | 17.8                                                            |
|           |                         |             |                                              |                                 | 344.0              | 6.05                                            | 18.1                                                            |

**Table S11.** Masses used to prepare reaction mixtures, concentrations of reagents in the reaction mixture, and rate constants for the reaction between 1-fluoro-2,4-dinitrobenzene **1** and ethanol (Scheme 1) in [bm<sub>4</sub>im][N(SO<sub>2</sub>CF<sub>3</sub>)<sub>2</sub>] **6** ( $\chi_{\text{IL}} = 0.786$ ).

| Masses    |                         |             | Concentrations                               |                                 | Temperature<br>/ K | Rate constants                                         |                                                                 |
|-----------|-------------------------|-------------|----------------------------------------------|---------------------------------|--------------------|--------------------------------------------------------|-----------------------------------------------------------------|
| IL<br>/ g | NEt <sub>3</sub><br>/ g | EtOH<br>/ g | [NEt <sub>3</sub> ]<br>/ mol L <sup>-1</sup> | [EtOH]<br>/ mol L <sup>-1</sup> |                    | $k_{\text{obs}}$<br>/ 10 <sup>-4</sup> s <sup>-1</sup> | $k_2$<br>/ 10 <sup>-4</sup> L mol <sup>-1</sup> s <sup>-1</sup> |
| 12.7      | 0.340                   | 0.176       | 0.336                                        | 0.382                           | 314.1              | 1.67                                                   | 4.37                                                            |
|           |                         |             |                                              |                                 | 314.0              | 1.60                                                   | 4.19                                                            |
|           |                         |             |                                              |                                 | 314.1              | 1.48                                                   | 3.87                                                            |
|           |                         |             |                                              |                                 | 324.1              | 2.70                                                   | 7.08                                                            |
|           |                         |             |                                              |                                 | 324.0              | 2.86                                                   | 7.49                                                            |
|           |                         |             |                                              |                                 | 324.0              | 2.38                                                   | 6.24                                                            |
|           |                         |             |                                              |                                 | 334.1              | 4.91                                                   | 12.9                                                            |
|           |                         |             |                                              |                                 | 334.0              | 4.85                                                   | 12.7                                                            |
|           |                         |             |                                              |                                 | 334.0              | 4.35                                                   | 11.4                                                            |
|           |                         |             |                                              |                                 | 344.1              | 7.18                                                   | 18.8                                                            |
|           |                         |             |                                              |                                 | 344.1              | 7.30                                                   | 19.1                                                            |
|           |                         |             |                                              |                                 | 344.0              | 7.39                                                   | 19.4                                                            |

**Table S12.** Masses used to prepare reaction mixtures, concentrations of reagents in the reaction mixture, and rate constants for the reaction between 1-fluoro-2,4-dinitrobenzene **1** and ethanol (Scheme 1) in [TOA][N(SO<sub>2</sub>CF<sub>3</sub>)<sub>2</sub>] **7** ( $\chi_{\text{IL}} = 0.651$ ).

| Masses    |                         |             | Concentrations                               |                                 | Temperature<br>/ K | Rate constants                                         |                                                                 |
|-----------|-------------------------|-------------|----------------------------------------------|---------------------------------|--------------------|--------------------------------------------------------|-----------------------------------------------------------------|
| IL<br>/ g | NEt <sub>3</sub><br>/ g | EtOH<br>/ g | [NEt <sub>3</sub> ]<br>/ mol L <sup>-1</sup> | [EtOH]<br>/ mol L <sup>-1</sup> |                    | $k_{\text{obs}}$<br>/ 10 <sup>-4</sup> s <sup>-1</sup> | $k_2$<br>/ 10 <sup>-4</sup> L mol <sup>-1</sup> s <sup>-1</sup> |
| 9.85      | 0.300                   | 0.174       | 0.297                                        | 0.379                           | 314.0              | 2.17                                                   | 5.73                                                            |
|           |                         |             |                                              |                                 | 314.0              | 2.09                                                   | 5.52                                                            |
|           |                         |             |                                              |                                 | 314.1              | 2.19                                                   | 5.79                                                            |
|           |                         |             |                                              |                                 | 324.0              | 3.24                                                   | 8.56                                                            |
|           |                         |             |                                              |                                 | 324.0              | 3.26                                                   | 8.62                                                            |
|           |                         |             |                                              |                                 | 324.1              | 3.43                                                   | 9.07                                                            |
|           |                         |             |                                              |                                 | 334.0              | 5.17                                                   | 13.7                                                            |
|           |                         |             |                                              |                                 | 334.1              | 5.07                                                   | 13.4                                                            |
|           |                         |             |                                              |                                 | 334.0              | 4.71                                                   | 12.4                                                            |
|           |                         |             |                                              |                                 | 344.0              | 6.92                                                   | 18.3                                                            |
|           |                         |             |                                              |                                 | 344.1              | 7.64                                                   | 20.2                                                            |
|           |                         |             |                                              |                                 | 344.1              | 8.35                                                   | 22.1                                                            |

**Table S13.** Masses used to prepare reaction mixtures, concentrations of reagents in the reaction mixture, and rate constants for the reaction between 1-fluoro-2,4-dinitrobenzene **1** and ethanol (Scheme 1) in mixtures containing Li[N(SO<sub>2</sub>CF<sub>3</sub>)<sub>2</sub>] ( $\chi_{\text{salt}} = 0.155$ ).

| Masses      |                         |             | Concentrations                               |                                 | Temperature<br>/ K | Rate constants                                         |                                                                 |
|-------------|-------------------------|-------------|----------------------------------------------|---------------------------------|--------------------|--------------------------------------------------------|-----------------------------------------------------------------|
| Salt<br>/ g | NEt <sub>3</sub><br>/ g | EtOH<br>/ g | [NEt <sub>3</sub> ]<br>/ mol L <sup>-1</sup> | [EtOH]<br>/ mol L <sup>-1</sup> |                    | $k_{\text{obs}}$<br>/ 10 <sup>-4</sup> s <sup>-1</sup> | $k_2$<br>/ 10 <sup>-4</sup> L mol <sup>-1</sup> s <sup>-1</sup> |
| 5.90        | 0.350                   | 5.00        | 0.346                                        | 10.9                            | 294.0              | 2.94                                                   | 0.271                                                           |
|             |                         |             |                                              |                                 | 294.0              | 2.94                                                   | 0.271                                                           |
|             |                         |             |                                              |                                 | 294.0              | 3.71                                                   | 0.342                                                           |
|             |                         |             |                                              |                                 | 304.1              | 7.59                                                   | 0.699                                                           |
|             |                         |             |                                              |                                 | 304.1              | 7.82                                                   | 0.721                                                           |
|             |                         |             |                                              |                                 | 304.0              | 7.48                                                   | 0.689                                                           |
|             |                         |             |                                              |                                 | 314.0              | 19.1                                                   | 1.76                                                            |
|             |                         |             |                                              |                                 | 314.0              | 14.4                                                   | 1.32                                                            |
|             |                         |             |                                              |                                 | 314.0              | 13.9                                                   | 1.28                                                            |
|             |                         |             |                                              |                                 | 324.0              | 37.2                                                   | 3.43                                                            |
|             |                         |             |                                              |                                 | 324.0              | 34.5                                                   | 3.18                                                            |
|             |                         |             |                                              |                                 | 324.0              | 31.9                                                   | 2.94                                                            |

The change in the activation parameters from  $\chi_{IL}$  0  $\rightarrow$  0.5,  $\chi_{IL}$  0.5  $\rightarrow$  0.8 and  $\chi_{IL}$  0  $\rightarrow$  0.8

**Table S14.** The change in the enthalpy ( $\Delta H^\ddagger$ ) and entropy of activation ( $\Delta S^\ddagger$ ) for the reaction between 1-fluoro-2,4-dinitrobenzene **1** and ethanol (Scheme 1) on changing solvent composition

| 1,4-bis(trifluoromethyl)benzene <b>1</b> and ethanol (Scheme 1) on changing solvent composition |                                                       |                                                             |                                                                           |
|-------------------------------------------------------------------------------------------------|-------------------------------------------------------|-------------------------------------------------------------|---------------------------------------------------------------------------|
| Solvent                                                                                         |                                                       | $\Delta(\Delta H^\ddagger) / \text{kJ mol}^{-1} \text{ }^a$ | $\Delta(\Delta S^\ddagger) / \text{J K}^{-1} \text{ mol}^{-1} \text{ }^a$ |
|                                                                                                 |                                                       |                                                             |                                                                           |
| <b>s</b>                                                                                        |                                                       |                                                             |                                                                           |
| [bmpyr][N(SO <sub>2</sub> CF <sub>3</sub> ) <sub>2</sub> ] <b>3</b>                             | $\chi_{\text{IL}} \text{ 0} \rightarrow \text{0.5}$   | -3.3 ± 2.0                                                  | 19 ± 6                                                                    |
| [bmim][N(SO <sub>2</sub> CF <sub>3</sub> ) <sub>2</sub> ] <b>4</b>                              |                                                       | 0.5 ± 0.7                                                   | 30 ± 3                                                                    |
| [bm <sub>2</sub> im][N(SO <sub>2</sub> CF <sub>3</sub> ) <sub>2</sub> ] <b>5</b>                |                                                       | 0.0 ± 3.9                                                   | 36 ± 12                                                                   |
| [bm <sub>4</sub> im][N(SO <sub>2</sub> CF <sub>3</sub> ) <sub>2</sub> ] <b>6</b>                |                                                       | 1.5 ± 1.8                                                   | 38 ± 5                                                                    |
| [TOA][N(SO <sub>2</sub> CF <sub>3</sub> ) <sub>2</sub> ] <b>7</b>                               |                                                       | -8.0 ± 2.7                                                  | 7 ± 8                                                                     |
| [bmpyr][N(SO <sub>2</sub> CF <sub>3</sub> ) <sub>2</sub> ] <b>3</b>                             | $\chi_{\text{IL}} \text{ 0.5} \rightarrow \text{0.8}$ | -2.7 ± 3.1                                                  | -2 ± 10                                                                   |
| [bmim][N(SO <sub>2</sub> CF <sub>3</sub> ) <sub>2</sub> ] <b>4</b>                              |                                                       | -4.9 ± 2.0                                                  | -9 ± 6                                                                    |
| [bm <sub>2</sub> im][N(SO <sub>2</sub> CF <sub>3</sub> ) <sub>2</sub> ] <b>5</b>                |                                                       | -10.6 ± 4.4                                                 | -30 ± 14                                                                  |
| [bm <sub>4</sub> im][N(SO <sub>2</sub> CF <sub>3</sub> ) <sub>2</sub> ] <b>6</b>                |                                                       | -9.5 ± 2.4                                                  | -24 ± 7                                                                   |
| [TOA][N(SO <sub>2</sub> CF <sub>3</sub> ) <sub>2</sub> ] <b>7</b>                               |                                                       | -8.6 ± 2.9                                                  | -18 ± 9                                                                   |
| [bmpyr][N(SO <sub>2</sub> CF <sub>3</sub> ) <sub>2</sub> ] <b>3</b>                             | $\chi_{\text{IL}} \text{ 0} \rightarrow \text{0.8}$   | -6.0 ± 2.4                                                  | 17 ± 7                                                                    |
| [bmim][N(SO <sub>2</sub> CF <sub>3</sub> ) <sub>2</sub> ] <b>4</b>                              |                                                       | -4.4 ± 1.9                                                  | 21 ± 6                                                                    |
| [bm <sub>2</sub> im][N(SO <sub>2</sub> CF <sub>3</sub> ) <sub>2</sub> ] <b>5</b>                |                                                       | -10.6 ± 2.0                                                 | 6 ± 6                                                                     |
| [bm <sub>4</sub> im][N(SO <sub>2</sub> CF <sub>3</sub> ) <sub>2</sub> ] <b>6</b>                |                                                       | -8.0 ± 1.6                                                  | 14 ± 5                                                                    |
| [TOA][N(SO <sub>2</sub> CF <sub>3</sub> ) <sub>2</sub> ] <b>7</b>                               |                                                       | -16.6 ± 1.1                                                 | -11 ± 3                                                                   |

<sup>a</sup> Errors are the compounded uncertainty of the activation parameters at both molefractions.

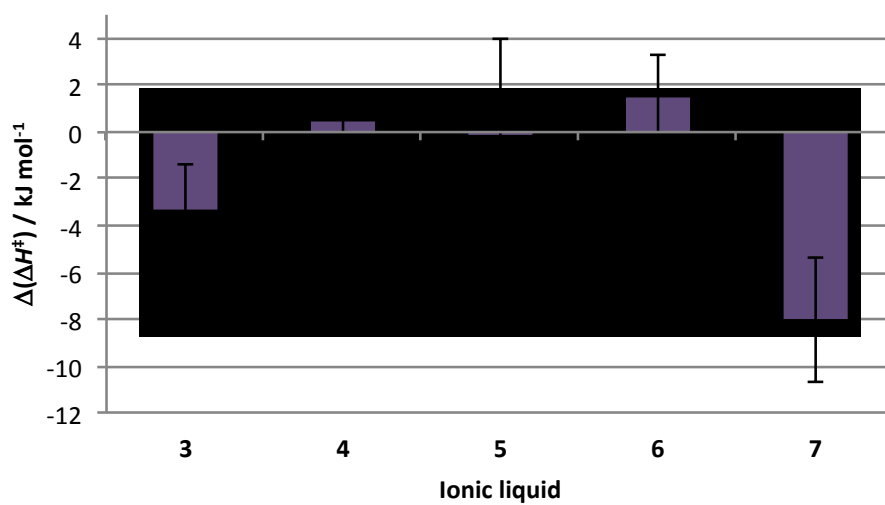

**Figure S2.** The change in the enthalpy of activation ( $\Delta H^\ddagger$ ) for the reaction between 1-fluoro-2,4-dinitrobenzene **1** and ethanol (Scheme 1) on moving from  $\chi_{\text{IL}} 0 \rightarrow 0.5$  for each of the ionic liquids **3-7**.

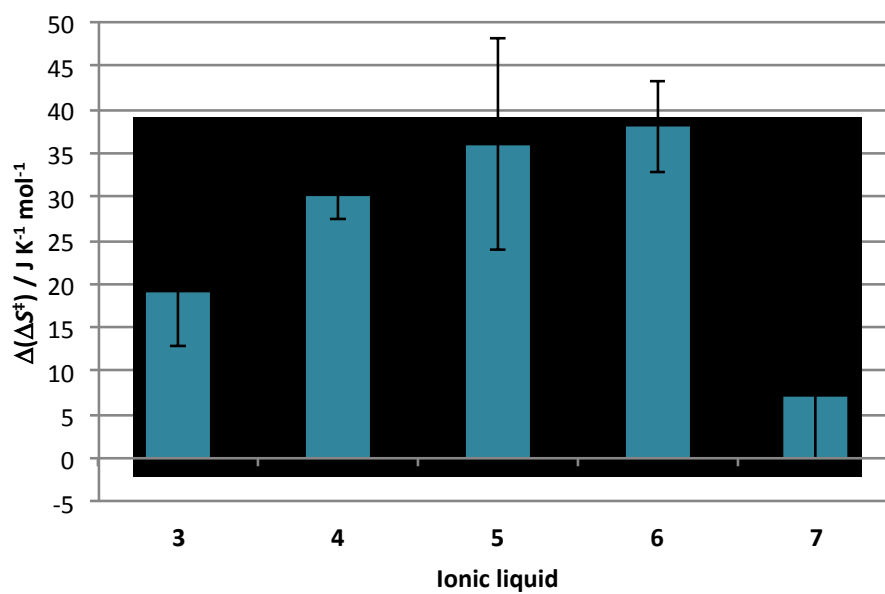

**Figure S3.** The change in the entropy of activation ( $\Delta S^\ddagger$ ) for the reaction between 1-fluoro-2,4-dinitrobenzene **1** and ethanol (Scheme 1) on moving from  $\chi_{\text{IL}} 0 \rightarrow 0.5$  for each of the ionic liquids **3-7**.

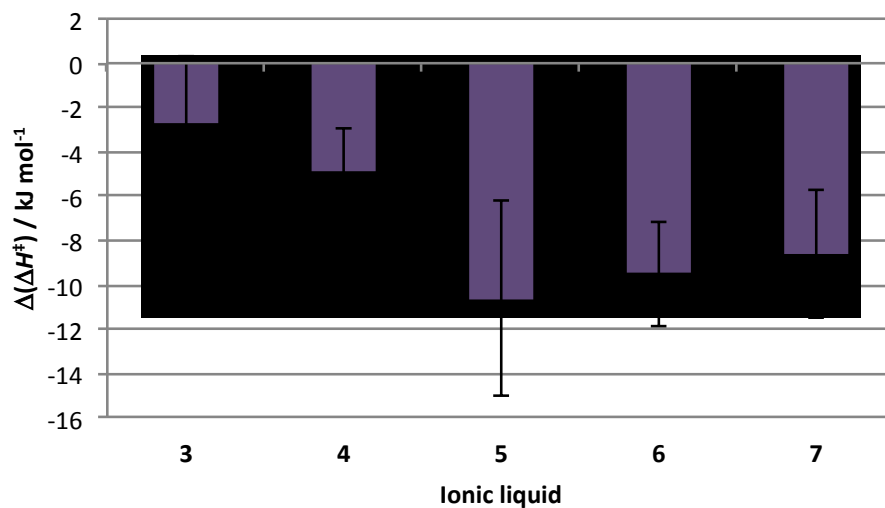

**Figure S4.** The change in the enthalpy of activation ( $\Delta H^\ddagger$ ) for the reaction between 1-fluoro-2,4-dinitrobenzene **1** and ethanol (Scheme 1) on moving from  $\chi_{\text{IL}}$  0.5  $\rightarrow$  0.8 for each of the ionic liquids **3-7**.

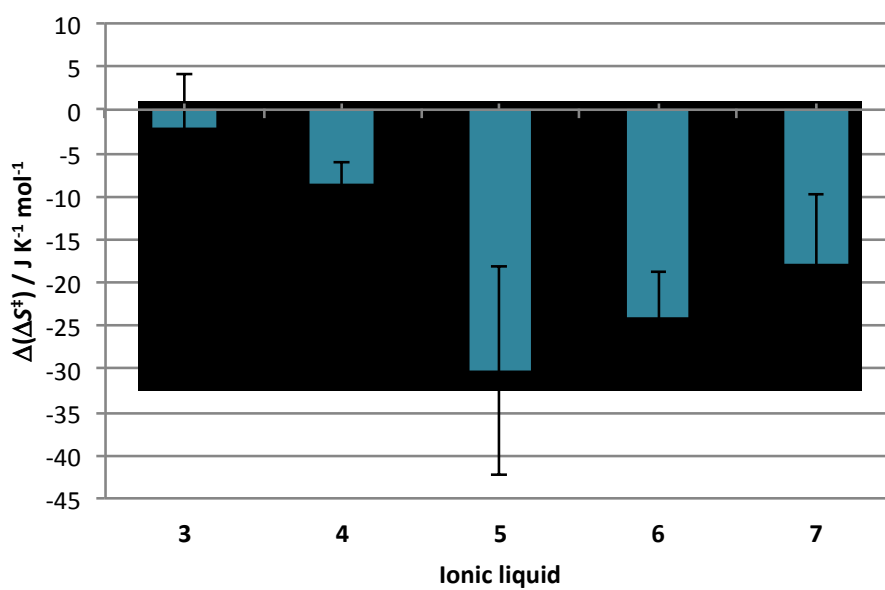

**Figure S5.** The change in the entropy of activation ( $\Delta S^\ddagger$ ) for the reaction between 1-fluoro-2,4-dinitrobenzene **1** and ethanol (Scheme 1) on moving from  $\chi_{\text{IL}}$  0.5  $\rightarrow$  0.8 for each of the ionic liquids **3-7**.

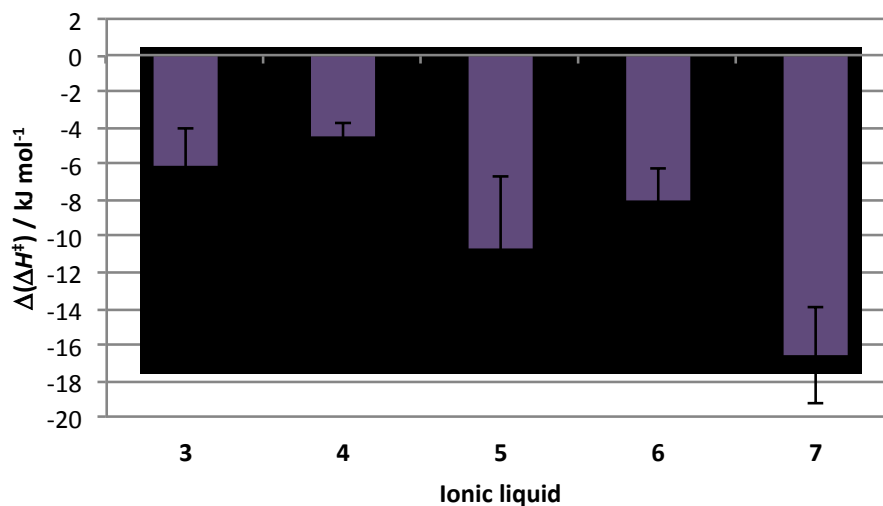

**Figure S6.** The change in the enthalpy of activation ( $\Delta H^\ddagger$ ) for the reaction between 1-fluoro-2,4-dinitrobenzene **1** and ethanol (Scheme 1) on moving from  $\chi_{\text{IL}} 0 \rightarrow 0.8$  for each of the ionic liquids **3-7**.

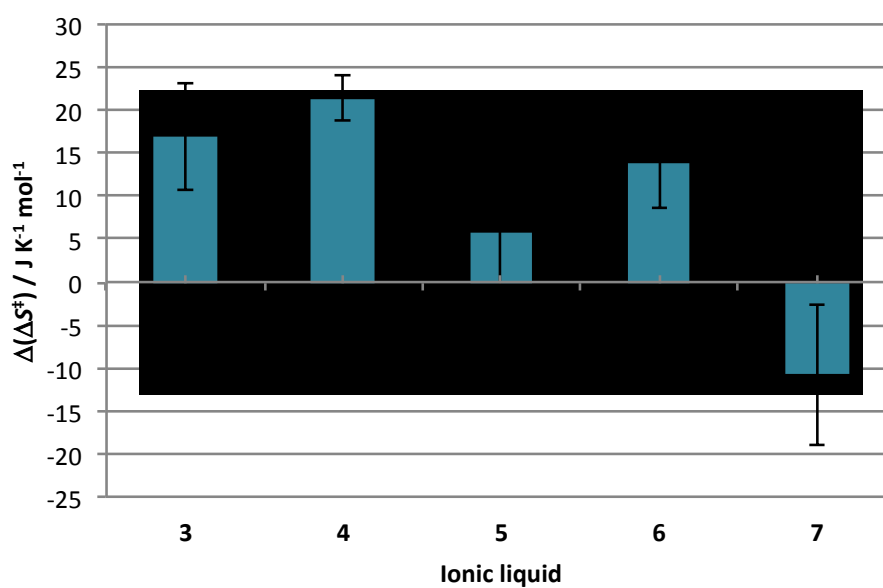

**Figure S7.** The change in the entropy of activation ( $\Delta S^\ddagger$ ) for the reaction between 1-fluoro-2,4-dinitrobenzene **1** and ethanol (Scheme 1) on moving from  $\chi_{\text{IL}} 0 \rightarrow 0.8$  for each of the ionic liquids **3-7**.

## References

1. V. Strehmel and V. Senkowski, *J. Polym. Sci. A Polym. Chem.*, 2015, **53**, 2849-2859.
2. A. Berthod, J. J. Kozak, J. L. Anderson, J. Ding and D. W. Armstrong, *Theor. Chem. Acc.*, 2007, **117**, 127-135.
3. M. Andre, J. Loidl, G. Laus, H. Schottenberger, G. Bentivoglio, K. Wurst and K. H. Ongania, *Anal. Chem.*, 2005, **77**, 702-705.
4. M. E. Wilhelm, M. H. Anthofer, R. M. Reich, V. D'Elia, J.-M. Basset, W. A. Herrmann, M. Cokoja and F. E. Kuhn, *Catal. Sci. Tech.*, 2014, **4**, 1638-1643.
5. E. E. L. Tanner, H. M. Yau, R. R. Hawker, A. K. Croft and J. B. Harper, *Org. Biomol. Chem.*, 2013, **11**, 6170-6175.
